# Supplementary material for: Characterizing the Assemblage of Wood-Decay Fungi in the Forests of Northwest Arkansas
Source: MDPI journal article supplement (doi:10.3390/jof7040309), 2021-04-16
Supplement: s1 [file s1]

**Characterizing the assemblage of wood-decay fungi in the forests  
of northwest Arkansas**

**Nawaf I. Alshammari<sup>1</sup>, Fuad Ameen<sup>2\*</sup>, Muneera, D.F. AlKahtani<sup>3</sup> and Stephenson, SL<sup>4</sup>**

<sup>1</sup>Department of Biological Sciences, University of Hail, Hail, Saudi Arabia

<sup>2</sup>Department of Botany & Microbiology, College of Science, King Saud University, Riyadh 11451, Saudi Arabia

<sup>3</sup>Department of Biology, College of Science, Princess Nourah Bint Abdulrahman University, Riyadh, Kingdom of Saudi Arabia.

<sup>4</sup>Department of Biological Sciences, University of Arkansas, Fayetteville, Arkansas USA

Correspondence email: fuadameen@ksu.edu.sa

**Supplementary tables**

**Table S1.** Taxa of wood-decay fungi recorded from northwest Arkansas. Note: %ID = percent sequence identity and SGB = sequence in GenBank.

| <b>Taxon</b>                                               | <b>Family</b>     | <b>SGB (ITS4)</b> | <b>SGB (ITS1)</b> |
|------------------------------------------------------------|-------------------|-------------------|-------------------|
| <i>Acanthophysium</i> sp. 1                                | Stereaceae        | -----             | NR_159629.1       |
| <i>Agaricus pinsitus</i> Fr.                               | Agaricaceae       | -----             | MH861223.1        |
| <i>Agrocybe acericola</i> (Peck) Singer                    | Bolbitiaceae      | MN860127.1        | MN860126.1        |
| <i>Amanita</i> sp. 1                                       | Amanitaceae       | -----             | KX348046.1        |
| <i>Antrodia</i> sp. 1 (Fr.) Donk                           | Fomitopsidaceae   | MN749971.1        | MN749970.1        |
| <i>Antrodia serialis</i> (Fr.) Donk                        | Fomitopsidaceae   | -----             | KC585304.1        |
| <i>Aspergillus ruber</i> (Jos. König, Spieck. & W. Bremer) | Trichocomaceae    | MN749936.1        | MN749935.1        |
| <i>Auricularia Americana</i> Parmasto & I. Parmasto        | Auriculaceae      | MN752647.1        | MN752646.1        |
| <i>Blastobotrys</i> sp. 1                                  | Trichomonascaceae | -----             | FM178345.1        |
| <i>Blastobotrys nivea</i> Klopotek                         | Trichomonascaceae | -----             | FM178345.1        |
| <i>Bolbitius bisporus</i> E.F. Malysheva                   | Bolbitiaceae      | -----             | NR153611.1        |
| <i>Bolbitius</i> sp. 1                                     | Bolbitiaceae      | -----             | JX968249.1        |

|                                                                |                   |            |             |
|----------------------------------------------------------------|-------------------|------------|-------------|
| <i>Boletales</i> sp. 1                                         | Bolbitiaceae      | MN808641.1 | MN808640.1  |
| <i>Byssomerulius incarnates</i> (Schwein.)<br>Gilb.            | Meruliaceae       | -----      | MF773635.1  |
| <i>Ceraceomyces</i> sp. 1                                      | Amylocorticiaceae | -----      | MH863804.1  |
| <i>Ceriporiopsis</i> sp. 1                                     | Phanerochaetaceae | -----      | NR_154636.1 |
| <i>Cerrena unicolor</i> (Bull.) Murrill                        | Cerrenaceae       | MT050490.1 | -----       |
| <i>Cladosporium cladosporioides</i><br>(Fresen.) G.A. de Vries | Davidiellaceae    | -----      | MF476049.1  |
| <i>Clitocybe subditopoda</i> Peck                              | Tricholomataceae  | -----      | KM453734.1  |
| <i>Clitopilus hobsonii</i> (Berk.) P.D. Orton                  | Entolomataceae    | MT032481.1 | -----       |
| <i>Clitopilus</i> sp. 1                                        | Entolomataceae    | MN826227.1 | MN826226.1  |
| <i>Clitopilus</i> sp. 2                                        | Entolomataceae    | MN826225.1 | MN826224.1  |
| <i>Clitopilus</i> sp. 3                                        | Entolomataceae    | MN826075.1 | MN826074.1  |

**Table S1.** Continued.

| <b>Taxon</b>                                                                            | <b>Family</b>   | <b>SGB (ITS4)</b> | <b>SGB (ITS1)</b> |
|-----------------------------------------------------------------------------------------|-----------------|-------------------|-------------------|
| <i>Coprinellus radians</i> (Fr.) Vilgalys,<br>Hopple & Jacq. Johnson                    | Psathyrellaceae | MN753980.1        | MN753979.1        |
| <i>Coprinellus</i> sp. 1                                                                | Psathyrellaceae | -----             | KX611630.1        |
| <i>Coprinus alnivorus</i> Bogart                                                        | Coprinaceae     | -----             | MK169326.1        |
| <i>Cordyceps cateniannulata</i> (Z.Q. Liang)<br>Kepler, B. Shrestha & Spatafora         | Cordycipitaceae | MN860177.1        | MN860176.1        |
| <i>Cordyceps confragosa</i> (Mains) G.H.<br>Sung, J.M. Sung, Hywel-Jones &<br>Spatafora | Clavicipitaceae | -----             | KT372853.1        |
| <i>Crepidotus applanatus</i> (Pers.) P.<br>Kumm.                                        | Cortinariaceae  | MN826231.1        | MN826230.1        |
| <i>Crepidotus</i> sp. 1                                                                 | Crepidotaceae   | -----             | MF161223.1        |
| <i>Crinipellis</i> sp. 2                                                                | Crepidotaceae   | MN977192.1        | -----             |
| <i>Crucibulum leave</i> (Huds.) Kambly                                                  | Nidulariaceae   | MN749576.1        | MN749575.1        |
| <i>Cryptococcus yokohamensis</i> Alshahni,<br>Satoh & Makimura                          | Tremellaceae    | -----             | HM222928.1        |

|                                                          |              |            |             |
|----------------------------------------------------------|--------------|------------|-------------|
| <i>Cyathus annulatus</i> H.J. Brodie                     | Agaricaceae  | MT032353.1 | -----       |
| <i>Cyathus renweii</i> T.X. Zhou & R.L. Zhao             | Agaricaceae  | -----      | NR_119589.1 |
| <i>Daedaleopsis confragosa</i> (Bolton) J. Schröt.       | Polyporaceae | MN749637.1 | MN749636.1  |
| <i>Daedaleopsis septentrionalis</i> (P. Karst.) Niemela  | Polyporaceae | MN749933.1 | MN749932.1  |
| <i>Daedaleopsis sinensis</i> (Lloyd) Y.C. Dai            | Polyporaceae | -----      | FJ627256.1  |
| <i>Daedaleopsis tricolor</i> (Bull.) Bondartsev & Singer | Polyporaceae | -----      | KY235366.1  |
| <i>Daldinia childiae</i> J.D. Rogers & Y.M. Ju           | Hypoxylaceae | MN860149.1 | MN860148.1  |
| <i>Diatrype stigma</i> (Hoffm.) Fr.                      | Diatrypaceae | MN809140.1 | MN809139.1  |

**Table S1.** Continued.

| <b>Taxon</b>                                             | <b>Family</b>     | <b>SGB (ITS4)</b> | <b>SGB (ITS1)</b> |
|----------------------------------------------------------|-------------------|-------------------|-------------------|
| <i>Donkia pulcherrima</i> (Berk. & M.A. Curtis) Pilát    | Phanerochaetaceae | MN860136.1        | -----             |
| <i>Ductifera pululahuana</i> (Pat.) Donk                 | Exidiaceae        | MN860170.1        | MN860169.1        |
| <i>Eichleriella</i> sp. 1                                | Exidiaceae        | -----             | MH349728.1        |
| <i>Entoloma platyphylloides</i> (Romagn.) Largent        | Entolomataceae    | -----             | JF908003.1        |
| <i>Eurotium rubrum</i> Jos. König, Spieck. & W. Bremer   | Trichocomaceae    | -----             | EU001331.1        |
| <i>Eurotium tuberculatum</i> Z.T. Qi & Z.M. Sun          | Aspergillaceae,   | -----             | HE615134.1        |
| <i>Exidia recisa</i> (Ditmar) Fr.                        | Auriculariaceae   | -----             | LC098751.1        |
| <i>Exidia</i> sp. 1                                      | Auriculariaceae   | MN752654.1        | MN752653.1        |
| <i>Exidia</i> sp. 2                                      | Auriculariaceae   | -----             | MF161299.1        |
| <i>Fuscoporia gilva</i> (Schwein.) T. Wagner & M. Fisch. | Hymenochaetaceae  | MN781978.1        | MN781977.1        |

|                                                        |                 |            |             |
|--------------------------------------------------------|-----------------|------------|-------------|
| <i>Galerina triscopa</i> (Fr.) Kühner                  | Sarcosomataceae | MT050467.1 | -----       |
| <i>Galiella rufa</i> (Schwein.) Nannf. & Korf          | Sarcosomataceae | MN826132.1 | MN826131.1  |
| <i>Ganoderma</i> sp. 1                                 | Ganodermataceae | MN964002.1 | MN964001.1  |
| <i>Ganoderma</i> sp. 2                                 | Ganodermataceae | -----      | AF255100.1  |
| <i>Ganoderma</i> sp. 3                                 | Ganodermataceae | MN749648.1 | MN749647.1  |
| <i>Gloeoporus dichrous</i> (Fr.) Bres.                 | Meruliaceae     | MN749626.1 | MN749625.1  |
| <i>Grammothele</i> sp. 1                               | Polyporaceae    | -----      | NR_158484.1 |
| <i>Gymnopilus decipiens</i> (Sacc.) P.D. Orton         | Cortinariaceae  | MN964270.1 | MN964269.1  |
| <i>Gymnopus biformis</i> (Peck) Halling                | Omphalotaceae   | -----      | KJ416250.1  |
| <i>Gymnopus dichrous</i> (Berk. & M.A. Curtis) Halling | Marasmiaceae    | MN864292.1 | MN864291.1  |
| <i>Gymnopus dryophilus</i> (Bull.) Murrill             | Omphalotaceae   | -----      | DQ449974.1  |

**Table S1.** Continued.

| <b>Taxon</b>                                                        | <b>Family</b> | <b>SGB (ITS4)</b> | <b>SGB (ITS1)</b> |
|---------------------------------------------------------------------|---------------|-------------------|-------------------|
| <i>Gymnopus earleae</i> Murrill                                     | Marasmiaceae  | -----             | DQ449994.1        |
| <i>Gymnopus erythropus</i> (Pers.) Antonín, Halling & Noordel.      | Omphalotaceae | -----             | KY950460.1        |
| <i>Gymnopus foliiphilus</i> R.H. Petersen                           | Omphalotaceae | -----             | KY026721.1        |
| <i>Gymnopus gibbosus</i> (Corner) A.W. Wilson, Desjardin & E. Horak | Omphalotaceae | -----             | KP012713.1        |
| <i>Gymnopus junquilleus</i> R.H. Petersen & J.L. Mata               | Omphalotaceae | -----             | KF007938          |
| <i>Gymnopus luxurians</i> (Peck) Murrill                            | Marasmiaceae  | MN860558.1        | =====             |
| <i>Gymnopus semihirtipes</i> (Peck) Halling                         | Marasmiaceae  | MT027500.1        | -----             |
| <i>Gymnopus</i> sp. 1                                               | Omphalotaceae | -----             | MK532854.1        |
| <i>Gymnopus spongiosus</i> (Berk. & M.A. Curtis) Halling            | Marasmiaceae  | -----             | KY026687.1        |

|                                                                   |                  |            |            |
|-------------------------------------------------------------------|------------------|------------|------------|
| <i>Gymnopus subnudus</i> (Ellis ex Peck) Halling                  | Marasmiaceae     | MT027360.1 | -----      |
| <i>Heimiomyces neovelutipes</i> (Hongo) E. Horak                  | Mycenaceae       | -----      | KM975407.1 |
| <i>Hericium erinaceus</i> (Bull.) Pers.                           | Hericiaceae      | MN752252.1 | MN752251.1 |
| <i>Heterobasidion araucariae</i> P.K. Buchanan                    | Bondarzewiaceae  | -----      | MH268104.1 |
| <i>Hohenbuehelia angustata</i> (Berk.) Singer                     | Pleurotaceae     | MN808821.1 | MN808820.1 |
| <i>Hohenbuehelia petaloides</i> (Bull.) Schulzer                  | Pleurotaceae     | -----      | GQ142023.1 |
| <i>Hydnochaete tabacina</i> (Berk. & M.A. Curtis ex Fr.) Ryvarden | Hymenochaetaceae | MN749624.1 | MN749623.1 |
| <i>Hymenochaete pinnatifida</i> Burt                              | Hymenochaetaceae | MN749653.1 | MN749652.1 |
| <i>Hymenochaete rubiginosa</i> (Dicks.) Lév.                      | Hymenochaetaceae | MT032360.1 | -----      |
| <i>Hymenochaete</i> sp. 1                                         | Hymenochaetaceae | -----      | MH211729.1 |

**Table S1.** Continued.

| <b>Taxon</b>                                     | <b>Family</b>     | <b>SGB (ITS4)</b> | <b>SGB (ITS1)</b> |
|--------------------------------------------------|-------------------|-------------------|-------------------|
| <i>Hyphodermella rosae</i> (Bres.) Nakasone      | Phanerochaetaceae | MN749631.1        | MN749630.1        |
| <i>Hyphodontia tropica</i> Sheng H. Wu           | Hymenochaetaceae  | MN752433.1        | MN752432.1        |
| <i>Hypholoma</i> sp. 1                           | Strophariaceae    | -----             | KY950514.1        |
| <i>Hypocrea peltata</i> Berk.                    | Hypocreaceae      | -----             | AB742524.1        |
| <i>Hypomyces microspermus</i> Rogerson & Samuels | Hypocreaceae      | MN872844.1        | MN872843.1        |
| <i>Hypoxylon crocopeplum</i> Berk. & M.A. Curtis | Xylariaceae       | MN964272.1        | MN964271.1        |
| <i>Infundibulicybe gibba</i> (Pers.) Harmaja     | Tricholomataceae  | -----             | MG663274.1        |
| <i>Inocybe</i> sp. 1                             | Inocybaceae       | MN964335.1        | MN964334.1        |
| <i>Inocybe subradiata</i> Murrill                | Inocybaceae       | -----             | MF992157.1        |
| <i>Irpex lacteus</i> (Fr.) Fr.                   | Steccherinaceae   | -----             | KT272411.1        |
| <i>Lachnum virgineum</i> (Batsch) P. Karst.      | Hyaloscyphaceae   | -----             | AB481268.1        |

|                                                       |                 |            |            |
|-------------------------------------------------------|-----------------|------------|------------|
| <i>Lactarius purpureocastaneus</i> X.H. Wang          | Russulaceae     | -----      | MF508965.1 |
| <i>Lactarius rubrocinctus</i> Fr.                     | Russulaceae     | MN872840.1 | MN871815.1 |
| <i>Lactarius subserifluus</i> Longyear                | Russulaceae     | -----      | EU819486.1 |
| <i>Leiotrametes lactinea</i> (Berk.) Welti & Courtec. | Polyporaceae    | MN860138.1 | MN860137.1 |
| <i>Lentinellus brunnescens</i> Lj.N. Vassiljeva       | Russulaceae     | MN860129.1 | MN860128.1 |
| <i>Lentinellus castoreus</i> (Fr.) Kühner & Maire     | Auriscalpiaceae | MN809125.1 | MN809124.1 |
| <i>Lentinellus</i> sp. 1                              | Auriscalpiaceae | -----      | AY513169.1 |
| <i>Lentinellus</i> sp. 2                              | Auriscalpiaceae | -----      | MH211871.1 |
| <i>Lentinus levis</i> (Berk. & M.A. Curtis) Murrill   | Polyporaceae    | MN809143.1 | MN809142.1 |
| <i>Lenzites betulinus</i> (L.) Fr.                    | Polyporaceae    | MN749633.1 | MN749632.1 |
| <i>Lenzites</i> sp.1                                  | Polyporaceae    | -----      | MK575249.1 |

**Table S1.** Continued.

| <b>Taxon</b>                                                   | <b>Family</b> | <b>SGB (ITS4)</b> | <b>SGB (ITS1)</b> |
|----------------------------------------------------------------|---------------|-------------------|-------------------|
| <i>Lepiota phaeosticta</i> Morgan                              | Agaricaceae   | MN826136.1        | MN826135.1        |
| <i>Lepiota</i> sp. 1                                           | Agaricaceae   | -----             | MH212044.1        |
| <i>Leucoagaricus americanus</i> (Peck) Vellinga                | Agaricaceae   | MN808631.1        | MN808630.1        |
| <i>Lycoperdon pyriforme</i> Schaeff.                           | Agaricaceae   | -----             | MF161171.1        |
| <i>Marasmiellus candidus</i> (Fr.) Singer                      | Marasmiaceae  | MN977325.1        | MN860121.1        |
| <i>Marasmiellus juniperinus</i> Murrill                        | Marasmiaceae  | -----             | NR_119582.1       |
| <i>Marasmiellus rhizomorphigenus</i> Antonín, Ryoo & H.D. Shin | Omphalotaceae | -----             | LT716051.1        |
| <i>Marasmiellus</i> sp. 1                                      | Meruliaceae   | -----             | MH856003.1        |
| <i>Marasmius</i> sp. 2                                         | Meruliaceae   | MN872842.1        | MN872841.1        |
| <i>Marasmius</i> sp. 3                                         | Meruliaceae   | MN871792.1        | MN871791.1        |

|                                                              |                 |            |             |
|--------------------------------------------------------------|-----------------|------------|-------------|
| <i>Marasmius cohaerens</i> (Pers.) Cooke & Quél.             | Marasmiaceae    | -----      | KF774176.1  |
| <i>Marasmius graminicola</i> Speg.                           | Marasmiaceae    | -----      | FJ917619.1  |
| <i>Marasmius oreades</i> (Bolton) Fr.                        | Marasmiaceae    | -----      | JN943604.1  |
| <i>Marasmius pulcherripes</i> Peck                           | Marasmiaceae    | MT032485.1 | -----       |
| <i>Marasmius rotula</i> (Scop.) Fr.                          | Marasmiaceae    | -----      | KC176355.1  |
| <i>Marasmius</i> sp. 1                                       | Marasmiaceae    | -----      | AY216476.1  |
| <i>Marasmius</i> sp. 2                                       | Marasmiaceae    | -----      | DQ182506.1  |
| <i>Mariannaea</i> sp. 1                                      | Nectriaceae     | -----      | NR_148078.1 |
| <i>Merulius incarnates</i> Schwein.                          | Meruliaceae     | MN782000.1 | MN781999.1  |
| <i>Microstoma floccosum</i> (Sacc.) Raitv.                   | Sarcoscyphaceae | -----      | AF026309.1  |
| <i>Mollisia incrustata</i> (Ellis) Sacc.                     | Dermateaceae    | MN860141.1 | MN860140.1  |
| <i>Morganella pyriformis</i> (Schaeff.) Kreisel & D. Krüger. | Agaricaceae     | -----      | LT635437.1  |
| <i>Morganella subincarnata</i> (Peck) Kreisel & Dring        | Agaricaceae     | MN964264.1 | -----       |

**Table S1.** Continued.

| <b>Taxon</b>                                | <b>Family</b>   | <b>SGB (ITS4)</b> | <b>SGB (ITS1)</b> |
|---------------------------------------------|-----------------|-------------------|-------------------|
| <i>Mortierella</i> sp. 1                    | Mortierellaceae | -----             | MF423523.1        |
| <i>Mycena acicula</i> (Schaeff.) P. Kumm.   | Mycenaceae      | MN781990.1        | MN781989.1        |
| <i>Mycena amicta</i> (Fr.) Quél.            | Mycenaceae      | MT027358.1        | -----             |
| <i>Mycena aurantiomarginata</i> (Fr.) Quél. | Mycenaceae      | -----             | JF908479.1        |
| <i>Mycena haematopus</i> (Pers.) P. Kumm    | Mycenaceae      | MN749929.1        | -----             |
| <i>Mycena inclinata</i> (Fr.) Quél          | Mycenaceae      | MT027356.1        | -----             |
| <i>Mycena leaiana</i> (Berk.) Sacc.         | Mycenaceae      | MN749928.1        | MN749927.1        |
| <i>Mycena niveipes</i> (Murrill) Murrill    | Mycenaceae      | -----             | MG748570.1        |
| <i>Mycena polygramma</i> (Bull.) Gray       | Mycenaceae      | -----             | FJ917615.1        |
| <i>Mycena</i> sp. 1                         | Mycenaceae      | MN781994.1        | MN781993.1        |
| <i>Mycena</i> sp. 2                         | Mycenaceae      | -----             | KJ206984.1        |
| <i>Mycena</i> sp. 3                         | Mycenaceae      | -----             | MK290378.1        |

|                                                                       |                 |            |            |
|-----------------------------------------------------------------------|-----------------|------------|------------|
| <i>Mycena thymicola</i> Velen.                                        | Mycenaceae      | -----      | JF908483.1 |
| <i>Mycena zephirus</i> (Fr.) P. Kumm.                                 | Mycenaceae      | MN781987.1 | MN781986.1 |
| <i>Mycetinis opacus</i> (Berk. & M.A. Curtis) A.W. Wilson & Desjardin | Marasmiaceae    | -----      | KY696767.1 |
| <i>Mycorrhaphium adustum</i> (Schwein.) Maas Geest.                   | Steccherinaceae | -----      | JN710573.1 |
| <i>Nectria mariannaeae</i> Samuels & Seifert                          | Nectriaceae     | -----      | GU586835.1 |
| <i>Neofavolus alveolaris</i> (DC.) Sotome & T. Hatt.                  | Polyporaceae    | -----      | KP283508.1 |
| <i>Neofavolus</i> sp. 1                                               | Polyporaceae    | MN860132.1 | MN860131.1 |
| <i>Neofavolus</i> sp. 2                                               | Polyporaceae    | MN860125.1 | MN860124.1 |
| <i>Neofavolus</i> sp. 3                                               | Polyporaceae    | MN752652.1 | MN752651.1 |
| <i>Neofavolus</i> sp. 4                                               | Polyporaceae    | MN749925.1 | MN749924.1 |
| <i>Neofavolus</i> sp. 5                                               | Polyporaceae    | MN749923.1 | MN749922.1 |
| <i>Nigroporus vinosus</i> (Berk.) Murrill                             | Steccherinaceae | -----      | JX109857.1 |

**Table S1.** Continued.

| <b>Taxon</b>                                          | <b>Family</b> | <b>SGB (ITS4)</b> | <b>SGB (ITS1)</b> |
|-------------------------------------------------------|---------------|-------------------|-------------------|
| <i>Panellus</i> sp. 1                                 | Mycenaceae    | -----             | MK399806.1        |
| <i>Panellus stipticus</i> (Bull.) P. Karst.           | Mycenaceae    | MN749586.1        | MN749585.1        |
| <i>Panus conchatus</i> (Bull.) Fr.                    | Panaceae      | MT032480.1        | -----             |
| <i>Panus lecomtei</i> (Fr.) Corner                    | Polyporaceae  | -----             | KP135329.1        |
| <i>Panus neostrigosus</i> Drechsler-Santos & Wartchow | Polyporaceae  | -----             | KU761235.1        |
| <i>Panus rudis</i> Fr.                                | Polyporaceae  | -----             | KU863048.1        |
| <i>Perenniporia ohiensis</i> (Berk.) Ryvarden         | Polyporaceae  | -----             | FJ411096.1        |
| <i>Pezizomycetes</i> sp. 1                            | Pezizomycetes | MN964250.1        | MN964249.1        |
| <i>Pezizomycetes</i> sp. 2                            | Pezizomycetes | -----             | JQ761310.1        |
| <i>Phaeomarasmium erinaceellus</i> (Peck) Singer      | Inocybaceae   | MN795482.1        | MN795481.1        |



|                                                                   |                   |            |            |
|-------------------------------------------------------------------|-------------------|------------|------------|
| <i>Phanerochaete pseudosanguinea</i><br>Floudas & Hibbett         | Phanerochaetaceae | MN749651.1 | MN749650.1 |
| <i>Phanerochaete sanguinea</i> (Fr.) Pouzar                       | Phanerochaetaceae | MT027238.1 | -----      |
| <i>Phanerochaete sordida</i> (P. Karst.) J.<br>Erikss. & Ryvarden | Phanerochaetaceae | -----      | MF476014.1 |
| <i>Phanerochaete</i> sp. 1                                        | Phanerochaetaceae | -----      | MF399407.1 |
| <i>Phellinus robiniae</i> (Murrill) A. Ames                       | Hymenochaetaceae  | -----      | KX065962.1 |
| <i>Phlebia tremellosa</i> (Schrad.) Nakasone<br>& Burds.          | Meruliaceae       | -----      | KJ668481.1 |
| <i>Phlebiopsis flavidoalba</i> (Cooke)<br>Hjortstam               | Phanerochaetaceae | -----      | KX065956.1 |
| <i>Pholiota multifolia</i> (Peck) A.H. Sm. &<br>Hesler            | Strophariaceae    | MT027490.1 | -----      |
| <i>Pholiota polychroa</i> (Berk.) A.H. Sm.<br>& H.J. Brodie       | Strophariaceae    | MN749584.1 | MN749583.1 |
| <i>Pholiotina aeruginosa</i> (Romagn.)<br>M.M. Moser              | Bolbitiaceae      | MT028143.1 | -----      |

**Table S1.** Continued.

| <b>Taxon</b>                                                                         | <b>Family</b>   | <b>SGB (ITS4)</b> | <b>SGB (ITS1)</b> |
|--------------------------------------------------------------------------------------|-----------------|-------------------|-------------------|
| <i>Physalacria</i> sp. 1                                                             | Physalacriaceae | -----             | DQ097367.1        |
| <i>Physisporinus pouzarii</i> (Vampola &<br>Vlasák) F. Wu, Jia J. Chen & Y.C.<br>Dai | Meripilaceae    | MN826134.1        | MN826133.1        |
| <i>Physisporinus vitreus</i> (Pers.) P. Karst.                                       | Meripilaceae    | -----             | KF800254.1        |
| <i>Pleurotus dryinus</i> (Pers.) P. Kumm.                                            | Pleurotaceae    | -----             | MH211881.1        |
| <i>Pleurotus floridanus</i> Singer                                                   | Bolbitiaceae    | -----             | MG819742.1        |
| <i>Pleurotus ostreatus</i> (Jacq. ex Fr.) P.<br>Kumm.                                | Pleurotaceae    | -----             | MH395969.1        |
| <i>Pleurotus pulmonarius</i> (Fr.) Quél                                              | Pleurotaceae    | MN808603.1        | MN808602.1        |
| <i>Pleurotus sapidus</i> Sacc.                                                       | Pleurotaceae    | -----             | KY962449.1        |
| <i>Pleurotus</i> sp. 1                                                               | Pleurotaceae    | MT027258.1        | -----             |
| <i>Pleurotus</i> sp. 2                                                               | Pleurotaceae    | MN860173.1        | MN860172.1        |

|                                                           |              |            |            |
|-----------------------------------------------------------|--------------|------------|------------|
| <i>Pleurotus</i> sp. 3                                    | Pleurotaceae | MN860144.1 | MN860143.1 |
| <i>Pleurotus</i> sp. 4                                    | Pleurotaceae | MN809106.1 | MN809105.1 |
| <i>cervinus</i> (Schaeff.) P. Kumm.                       | Pleurotaceae | MN749645.1 | MN749644.1 |
| <i>Pluteus petasatus</i> (Fr.) Gillet                     | Pleurotaceae | MN749639.1 | MN749638.1 |
| <i>Pluteus romellii</i> (Britzelm.) Sacc.                 | Pleurotaceae | MN752313.1 | MN752312.1 |
| <i>Pluteus cervinus</i> (Schaeff.) P. Kumm.               | Pleurotaceae | -----      | KF306014.1 |
| <i>Pluteus chrysophlebius</i> (Berk. & M.A. Curtis) Sacc. | Pleurotaceae | MN860123.1 | MN860122.1 |
| <i>Pluteus glaucotinctus</i> E. Horak                     | Pluteaceae   | -----      | MH211860.1 |
| <i>Pluteus hispidulus</i> (Fr.) Gillet                    | Pluteaceae   | -----      | KM983696.1 |
| <i>Pluteus hongoi</i> Singer                              | Pleurotaceae | MN752233.1 | MN752232.1 |
| <i>Pluteus longistriatus</i> (Peck) Peck                  | Pluteaceae   | MT032365.1 | -----      |
| <i>Pluteus pellitus</i> (Pers.) P. Kumm.                  | Pluteaceae   | -----      | MH211659.1 |
| <i>Pluteus petasatus</i> (Fr.) Gillet                     | Pluteaceae   | -----      | KJ009707.1 |
| <i>Pluteus romellii</i> (Britzelm.) Sacc.                 | Pluteaceae   | -----      | KM983699.1 |
| <i>Pluteus</i> sp. 1                                      | Pluteaceae   | -----      | KM983694.1 |

**Table S1.** Continued.

| <b>Taxon</b>                                                 | <b>Family</b>    | <b>SGB (ITS4)</b> | <b>SGB (ITS1)</b> |
|--------------------------------------------------------------|------------------|-------------------|-------------------|
| <i>Pluteus thomsonii</i> sensu Singer                        | Pluteaceae       | -----             | KX216328.1        |
| <i>Polyporales</i> sp.                                       | Polyporaceae     | MN809134.1        | MN809133.1        |
| <i>Polyporus alveolaris</i> (DC.) Bondartsev & Singer        | Polyporaceae     | -----             | KJ140677.1        |
| <i>Polyporus</i> sp. 1                                       | Polyporaceae     | -----             | AB746931.1        |
| <i>Polyporus</i> sp. 2                                       | Polyporaceae     | -----             | KU324794.1        |
| <i>Polyporus tuberaster</i> (Jacq. ex Pers.) Fr.             | Polyporaceae     | MT032482.1        | -----             |
| <i>Polyporus varius</i> (Pers.) Fr.                          | Polyporaceae     | MT050461.1        | MT050460.1        |
| <i>Psathyrella</i> sp. 1                                     | Psathyrellaceae  | -----             | KC992949.1        |
| <i>Pseudochaete tabacina</i> (Sowerby) T. Wagner & M. Fisch. | Hymenochaetaceae | -----             | KJ140591.1        |

|                                                              |                  |            |            |
|--------------------------------------------------------------|------------------|------------|------------|
| <i>Resupinatus alboniger</i> (Pat.) Singer                   | Pleurotaceae     | MN752401.1 | MN752400.1 |
| <i>Resupinatus applicatus</i> (Batsch) Gray                  | Tricholomataceae | -----      | KU355368.1 |
| <i>Rhizomarasmius pyrrocephalus</i> (Berk.)<br>R.H. Petersen | Psathyrellaceae  | MN752228.1 | MN752227.1 |
| <i>Rhizopus oryzae</i> Went & Prins. Geerl.                  | Mucoraceae       | -----      | FJ478087.1 |
| <i>Rhodocollybia badiialba</i> (Murrill)<br>Lennox           | Omphalotaceae    | MN826119.1 | MN826118.1 |
| <i>Rhodotus</i> sp. 1                                        | Physalacriaceae  | -----      | MG748585.1 |
| <i>Rigidoporus pouzarii</i> Vampola &<br>Vlasák              | Meripilaceae     | -----      | JQ733558.1 |
| <i>Rigidoporus</i> sp. 1                                     | Meripilaceae     | -----      | MG845229.1 |
| <i>Russula pectinatoides</i> Peck                            | Russulaceae      | -----      | MH211829.1 |
| <i>Sarcoscypha korfiana</i> F.A. Harr.                       | Sarcoscyphaceae  | -----      | AF026308.2 |
| <i>Sarcoscypha occidentalis</i> (Schwein.)<br>Sacc.          | Sarcoscyphaceae  | MN808749.1 | MN808748.1 |
| <i>Schizophyllum commune</i> Fr.                             | Schizophyllaceae | MN781968.1 | MN781967.1 |
| <i>Schizophyllum radiatum</i> Fr.                            | Schizophyllaceae | -----      | LT217545.1 |

**Table S1.** Continued.

| <b>Taxon</b>                                                       | <b>Family</b>   | <b>SGB (ITS4)</b> | <b>SGB (ITS1)</b> |
|--------------------------------------------------------------------|-----------------|-------------------|-------------------|
| <i>Schizopora ovispora</i> (Corner)<br>Hjortstam & Ryvarden        | Schizoporaceae  | -----             | KX857803.1        |
| <i>Scutellinia crinite</i> (Bull.) Lambotte.                       | Pyronemataceae  | MN752431.1        | MN752430.1        |
| <i>Scutellinia</i> sp. 1                                           | Pyronemataceae  | -----             | MF230412.1        |
| <i>Simocybe serrulata</i> (Murrill) Singer                         | Inocybaceae     | MN872846.1        | MN872845.1        |
| <i>Simocybe</i> sp. 1                                              | Inocybaceae     | MN860159.1        | MN860158.1        |
| <i>Simocybe</i> sp. 2                                              | Inocybaceae     | MN809131.1        | MN809130.1        |
| <i>Simplicillium aogashimaense</i> Nonaka,<br>Kaifuchi & Masuma    | Cordycipitaceae | MT027492.1        | MT027491.1        |
| <i>Simplicillium lanosoniveum</i> (J.F.H.<br>Beyma) Zare & W. Gams | Cordycipitaceae | -----             | AB758126.1        |

|                                                                                  |                 |            |            |
|----------------------------------------------------------------------------------|-----------------|------------|------------|
| <i>Skeletocutis nivea</i> (Jungh.) Jean Keller                                   | Polyporaceae    | MN781970.1 | MN781969.1 |
| <i>Skeletocutis semipileata</i> (Peck)<br>Miettinen & A. Korhonen                | Polyporaceae    | MN964075.1 | MN964074.1 |
| <i>Spongipellis pachyodon</i> (Pers.) Kotl. &<br>Pouzar                          | Hapalopilaceae  | MT027357.1 | -----      |
| <i>Steccherinum bourdotii</i> Saliba & A.<br>David                               | Steccherinaceae | MN749594.1 | MN749593.1 |
| <i>Steccherinum laeticolor</i> (Berk. & M.A.<br>Curtis) Banker                   | Steccherinaceae | MT027254.1 | -----      |
| <i>Steccherinum murashkinskyi</i> (Burt)<br>Maas Geest.                          | Steccherinaceae | -----      | FJ798705.1 |
| <i>Steccherinum undigerum</i> (Berk. &<br>M.A. Curtis) Westphalen &<br>Tomšovský | Steccherinaceae | MN781992.1 | MN781991.1 |
| <i>Stereum complicatum</i> (Fr.) Fr.                                             | Stereaceae      | MN749663.1 | MN749662.1 |
| <i>Stereum hirsutum</i> (Willd.) Pers.                                           | Stereaceae      | -----      | MH211730.1 |
| <i>Stereum ostrea</i> (Blume & T. Nees) Fr.                                      | Stereaceae      | MN749635.1 | MN749634.1 |
| <i>Stereum sanguinolentum</i> (Alb. &<br>Schwein.) Fr.                           | Stereaceae      | MN864252.1 | MN864251.1 |

**Table S1.** Continued.

| <b>Taxon</b>                               | <b>Family</b>    | <b>SGB (ITS4)</b> | <b>SGB (ITS1)</b> |
|--------------------------------------------|------------------|-------------------|-------------------|
| <i>Stereum</i> sp. 1                       | Stereaceae       | MN965750.1        | MN965749.1        |
| <i>Stereum</i> sp. 2                       | Stereaceae       | MN864258.1        | MN864257.1        |
| <i>Stereum</i> sp. 3                       | Stereaceae       | MN752263.1        | MN752262.1        |
| <i>Stereum</i> sp. 4                       | Stereaceae       | MN749665.1        | MN749664.1        |
| <i>Stereum</i> sp. 5                       | Stereaceae       | -----             | KJ831876.1        |
| <i>Stereum</i> sp. 6                       | Stereaceae       | -----             | KJ831881.1        |
| <i>Stereum</i> sp. 7                       | Stereaceae       | -----             | MH268105.1        |
| <i>Strobilomyces</i> sp.                   | Boletaceae       | -----             | MK733920.1        |
| <i>Tetrapyrgos nigripes</i> (Fr.) E. Horak | Marasmiaceae     | -----             | DQ449942.1        |
| <i>Theleporus</i> sp. 1                    | Grammotheleaceae | -----             | NR_119985.1       |

|                                                                    |                  |            |            |
|--------------------------------------------------------------------|------------------|------------|------------|
| <i>Tomentella</i> sp. 1                                            | Thelephoraceae   | -----      | EU625920.1 |
| <i>Trametes conchifer</i> (Schwein.) Pilát                         | Polyporaceae     | MN749629.1 | MN749628.1 |
| <i>Trametes cubensis</i> (Mont.) Sacc.                             | Polyporaceae     | MN860166.1 | MN860165.1 |
| <i>Trametes elegans</i> (Spreng.) Fr.                              | Polyporaceae     | MN749588.1 | MN749587.1 |
| <i>Trametes hirsute</i> (Wulfen) Lloyd                             | Polyporaceae     | -----      | GQ280373.1 |
| <i>Trametes</i> sp. 1                                              | Polyporaceae     | MN964006.1 | MN964005.1 |
| <i>Trametes</i> sp. 2                                              | Polyporaceae     | MN752650.1 | MN752649.1 |
| <i>Trametes versicolor</i> (L.) Lloyd                              | Polyporaceae     | MN749590.1 | MN749589.1 |
| <i>Trametes villosa</i> (Sw.) Kreisel                              | Polyporaceae     | MN781670.1 | MN781669.1 |
| <i>Trametopsis cervina</i> (Schwein.)<br>Tomšovský                 | Polyporaceae     | MN749931.1 | MN749930.1 |
| <i>Trametopsis</i> sp. 1                                           | Hapalopilaceae   | -----      | MG663240.1 |
| <i>Tremella yokohamensis</i> (Alshahni,<br>Sato & Makimura) Yurkov | Tremellaceae     | MN752643.1 | MN752642.1 |
| <i>Trichaptum biforme</i> (Fr.) Ryvarden                           | Polyporaceae (?) | MN964276.1 | MN964275.1 |
| <i>Trichaptum fuscoviolaceum</i> (Ehrenb.)<br>Ryvarden             | Polyporaceae     | -----      | MF381026.1 |

**Table S1.** Continued.

| <b>Taxon</b>                                    | <b>Family</b> | <b>SGB (ITS4)</b> | <b>SGB (ITS1)</b> |
|-------------------------------------------------|---------------|-------------------|-------------------|
| <i>Trichoderma atroviride</i> P. Karst.         | Hypocreaceae  | MT027497.1        | -----             |
| <i>Trichoderma gamsii</i> Samuels &<br>Druzhin. | Hypocreaceae  | -----             | KX009501.1        |
| <i>Trichoderma</i> sp. 1                        | Hypocreaceae  | MT027495.1        | -----             |
| <i>Trichoderma</i> sp. 2                        | Hypocreaceae  | -----             | AB872440.1        |
| <i>Trichoderma viride</i> Pers.                 | Hypocreaceae  | -----             | KM458804.1        |
| <i>Trogia furcata</i> Corner                    | Marasmiaceae  | -----             | MF100962.1        |
| <i>Truncospora ohiensis</i> (Berk.) Pilát       | Polyporaceae  | MT027494.1        | MT027493.1        |
| <i>Truncospora</i> sp. 1                        | Polyporaceae  | -----             | KP768411.1        |
| <i>Tylopilus felleus</i> (Bull.) P. Karst.      | Boletaceae    | MT032364.1        | -----             |

|                                                           |                 |            |            |
|-----------------------------------------------------------|-----------------|------------|------------|
| <i>Tylopilus rubrobrunneus</i> Mazzer & A.H. Sm.          | Boletaceae      | -----      | GQ166869.1 |
| <i>Tyromyces galactinus</i> (Berk.) Bondartsev            | Polyporaceae    | MN872818.1 | MN872817.1 |
| <i>Tyromyces kmetii</i> (Bres.) Bondartsev & Singer       | Polyporaceae    | MN749592.1 | MN749591.1 |
| <i>Urnula craterium</i> (Schwein.) Fr.                    | Sarcosomataceae | MN781996.1 | MN781995.1 |
| <i>Xeromphalina kauffmanii</i> A.H. Sm.                   | Mycenaceae      | -----      | MG663296.1 |
| <i>Xylaria cornu-damae</i> (Schwein.) Berk.               | Xylariaceae     | MT027514.1 | -----      |
| <i>Xylaria heliscus</i> (Mont.) J.D. Rogers & Y.M. Ju     | Xylariaceae     | MT027515.1 | -----      |
| <i>Xylaria hypoxylon</i> (L.) Grev.                       | Xylariaceae     | -----      | U47841     |
| <i>Xylaria</i> sp. 1                                      | Xylariaceae     | MT028182.1 | -----      |
| <i>Xylaria</i> sp. 2                                      | Xylariaceae     | -----      | KU683962.1 |
| <i>Xylobolus subpileatus</i> (Berk. & M.A. Curtis) Boidin | Stereaceae      | MN750025.1 | MN750024.1 |
| <i>Xylodon subflaviporus</i> C.C. Chen & Sheng H. Wu      | Stereaceae      | MN749657.1 | MN749656.1 |

**Table. S2.** Unidentified species of wood-decay fungi.

| <b>Taxon</b>        | <b>SGB (ITS4)</b> | <b>SGB (ITS1)</b> |
|---------------------|-------------------|-------------------|
| Unidentified fungus | MN872814.1        | MN872833.1        |
| Unidentified fungus | MN964278.1        | MN964277.1        |
| Unidentified fungus | MN872837.1        | MN872836.1        |
| Unidentified fungus | MN872835.1        | MN872834.1        |
| Unidentified fungus | MN872830.1        | MN872829.1        |
| Unidentified fungus | MN872824.1        | MN872823.1        |
| Unidentified fungus | MN872826.1        | -----             |
| Unidentified fungus | MN872822.1        | MN872821.1        |
| Unidentified fungus | MN872820.1        | MN872819.1        |
| Unidentified fungus | MN872816.1        | MN872815.1        |

|                     |            |            |
|---------------------|------------|------------|
| Unidentified fungus | MN872811.1 | MN872810.1 |
| Unidentified fungus | MN872809.1 | MN872808.1 |
| Unidentified fungus | MN872807.1 | MN872806.1 |
| Unidentified fungus | MN831409.1 | MN831408.1 |
| Unidentified fungus | MN831407.1 | MN831406.1 |
| Unidentified fungus | MN831389.1 | MN831388.1 |
| Unidentified fungus | MN831401.1 | MN831400.1 |
| Unidentified fungus | MN831385.1 | -----      |
| Unidentified fungus | MN831387.1 | MN831384.1 |
| Unidentified fungus | -----      | MN831386.1 |
| Unidentified fungus | MN831405.1 | MN831404.1 |
| Unidentified fungus | MN831381.1 | MN831380.1 |
| Unidentified fungus | MN831391.1 | MN831390.1 |
| Unidentified fungus | MN831393.1 | MN831392.1 |
| Unidentified fungus | MN831399.1 | -----      |
| Unidentified fungus | MN831395.1 | MN831398.1 |
| Unidentified fungus | -----      | MN831394.1 |
| Unidentified fungus | MN831397.1 | MN831396.1 |

**Table. S2** Continued.

| <b>Taxon</b>        | <b>SGB (ITS4)</b> | <b>SGB (ITS1)</b> |
|---------------------|-------------------|-------------------|
| Unidentified fungus | MN831383.1        | -----             |
| Unidentified fungus | MN831403.1        | MN831382.1        |
| Unidentified fungus | -----             | MN831402.1        |
| Unidentified fungus | MN781976.1        | MN781975.1        |
| Unidentified fungus | -----             | MN872825.1        |
| Unidentified fungus | -----             | MN860557.1        |
| fungus sp. 1        | MT027496.1        | -----             |
| fungus sp. 2        | MN860156.1        | MN860155.1        |
| fungus sp. 3        | MN826229.1        | MN826228.1        |

fungal sp. 4

MN749668.1

MN749667.1

---
